# Supplementary material for: Stepwise Oligocene–Miocene breakdown of subpolar gyres and strengthening of the Antarctic Circumpolar Current
Source: Copernicus journal article supplement (doi:10.5194/jm-43-497-2024), 2024-12-19
Supplement: Supplementary file 1 [file jm-43-497-2024-supplement.zip]

## Sheet: 696 combined
Counted by	Leg	Site	Hole	Core	Section	Interval	Weight	Lycopodium	Lycopodium tablet size	Lycopodium/g	Counted grams	lower depth	upper depth	Depth	Age (Ma)	Unit	Total DC det	Counted slides	Note	Achomosphaera alcicornu	Alterbidinium distinctum	Batiacasphaera sp.	Batiacasphaera sp. 1?	Brigantedinium? sp. A tabulated	Brigantedinium pynei	Brigantedinium simplex	Cerebrocysta spp.	Chiropteridium galea	Cordosphaeridium fibrospinosum	Cordosphaeridium minimum	Corrudinium incompositum	Corrudinium regulare	Corrudinium spp.	Deflandrea antarctica	Deflandrea spp. Indet	Elytrocysta spp.	Enneadocyst diktyostila	Gelatia inflata	Hystrichokolpoma rigaudiae	Impagidinium aculeatum	Impagidinium spp.	Impagidinium pallidum	Imagidinium paradoxum	Impagidinium patulum	Impagidinium victorium	Invertocysta tabulata	Lejeunecysta acuminata	Lejeunecysta adeliensis	Lejeunecysta cinctoria
Hoem - this study	113	696	B	50	1W	49-52		839						520.68	16.5	Early Miocene	166		some reworked and low preservation						11	107											1			3		3					4
Hoem - this study	113	696	B	50	1W	86-88		139						521.06	16.5	Early Miocene	202					7	5		26	93				1	1		1								1	2		1		3
Hoem - this study	113	696	B	50	1W	143-145		61						521.63	16.7	Early Miocene	272		Very consentrated with dinos			10	31	2	8	42	4				1												4	3			1
Hoem - this study	113	696	B	50	2W	12 - 15cm		169						521.77	<23.06	Early Miocene	209		FO I. Tabulata (23.06ma)			25	1		45	60				1			2				1						1			2	4		2
Hoem - this study	113	696	B	50	2W	43-45cm		223						522.08		Early Miocene	221					1			51	64							1									5	3				11		15
Hoem - this study	113	696	B	51	1W	12-15cm		527						529.92		Late Oligocene	65		few dinos, not included in pie charts			1			6	9		1		2				1	3		14		1				1		1
Hoem - this study	113	696	B	51	1W	143-145cm		682						531.23		Late Oligocene	68		few dinos, not included in pie charts		1	6			4	10				1				1	3		23	3
Hoem - this study	113	696	B	52	1W	11-15cm		450						539.52		Late Oligocene	59		few dinos, not included in pie charts	2						2				3				4	3		13
Houben et al., 2019	113	696	B	53	1W	4-7		55				548.97	548.94	548.955	33.2	Early Oligocene	38.5		EC4							6											1								2
Houben et al., 2019	113	696	B	53	2W	128-130		66				551.7	551.68	551.69	33.2848	Early Oligocene	18.5		E2							9
Houben et al., 2019	113	696	B	53	3W	80-82		47				552.72	552.7	552.71	33.3032	Early Oligocene	21		E3							11
Houben et al., 2019	113	696	B	53	4W	99-101		43				554.41	554.39	554.4	33.3338	Early Oligocene	36		E5							17									1
Houben et al., 2019	113	696	B	53	5W	86-88		62				555.78	555.76	555.77	33.3586	Early Oligocene	53		E11							9
Houben et al., 2019	113	696	B	53	6W	30-32		32				556.72	556.7	556.71	33.3756	Early Oligocene	80		E13							25
Houben et al., 2019	113	696	B	53	6W	132-134		67				557.74	557.72	557.73	33.3941	Early Oligocene	40		E8							10
Houben et al., 2019	113	696	B	54	1W	7-10		62				558.6	558.57	558.585	33.4096	Early Oligocene	50		E9							11
Houben et al., 2019	113	696	B	54	1W	84-86		66				559.35	559.33	559.34	33.4232	Early Oligocene	62.5		E10							22											2
Houben et al., 2019	113	696	B	54	2W	137-139		45				561.39	561.37	561.38	33.4601	Early Oligocene	34.5		E16							15									2		3
Houben et al., 2019	113	696	B	54	3W	135-137		46				562.87	562.85	562.86	33.4869	Early Oligocene	191		EB5							163								1			4		1
Houben et al., 2019	113	696	B	54	4W	33-31		46				563.33	563.31	563.32	33.4952	Early Oligocene	73.5		E18		1					19								2			17								1
Houben et al., 2019	113	696	B	55	1W	10-12		78				568.32	568.3	568.31	33.5855	Early Oligocene	162	1	E19							22											1
Houben et al., 2019	113	696	B	55	1W	62-64		68				568.84	568.82	568.83	33.5949	Early Oligocene	86	1	EC6							17																			1
Houben et al., 2019	113	696	B	55	1W	117-119		103				569.39	569.37	569.38	33.622	Early Oligocene	159									53											2				1
Houben et al., 2019	113	696	B	55	2W	69-72		59				570.4	570.36	570.39	33.707	Early Oligocene	360					7	5		4	20				3				1							3		1				2	2
Houben et al., 2019	113	696	B	55	2W	147-150		75				571.185	571.155	571.17	33.7675	Late Eocene	172.5	1	EC8							38											2				2
Houben et al., 2019	113	696	B	55	3W	75-78		78				571.98	571.95	571.965	33.8196	Late Eocene	76.5		EC9							31								1							2
Houben et al., 2019	113	696	B	55	3W	126-129		88				572.49	572.46	572.475	33.8449	Late Eocene	84	1	EC10							55															2
Houben et al., 2019	113	696	B	55	4W	54-57		86				573.27	573.24	573.255	33.8835	Late Eocene	65	1	EB7							25								1
Houben et al., 2019	113	696	B	55	5W	40-43		77				574.63	574.6	574.615	33.9509	Late Eocene	40	1	EC11							24								2
Houben et al., 2019	113	696	B	55	5W	148-150		100				575.7	575.6	575.69	34.0042	Late Eocene	119	1,3	EB8							70			1					3	6
Houben et al., 2019	113	696	B	55	6W	29-31		53				576.1	575.9	576	34.0196	Late Eocene	81	1,2	EC12							38								6											2
Houben et al., 2019	113	696	B	57	1W	65-67		80				588.27	588.25	588.26	34.6273	Late Eocene	37	1			1					9										3
Houben et al., 2019	113	696	B	58	01W	124-127		58				598.47	598.44	598.455	35.1327	Late Eocene	20	1	ED1							6						1					1
Houben et al., 2019	113	696	B	59	5W	50-52		70				613.42	613.4	613.41	35.8739	Late Eocene	49	1	ED7		1					6								1
Houben et al., 2019	113	696	B	60	5W	75-78		61				623.38	623.35	623.365	36.3885	Late Eocene	18	1	ED11							5								2			1
Houben et al., 2019	113	696	B	61	1W	61-63		62				626.83	626.81	626.82	36.5969	Late Eocene	22.5	1	ED12							4								2			1.5
[truncated: 85 more columns]
