# Supplementary material for: Stepwise Oligocene–Miocene breakdown of subpolar gyres and strengthening of the Antarctic Circumpolar Current
Source: Copernicus journal article supplement (doi:10.5194/jm-43-497-2024), 2024-12-19
Supplement: Supplementary file 1 [file jm-43-497-2024-supplement.zip]

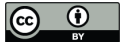

## *Supplement of*

# **Stepwise Oligocene–Miocene breakdown of subpolar gyres and strengthening of the Antarctic Circumpolar Current**

**Frida S. Hoem et al.**

*Correspondence to:* Frida S. Hoem ([frida.hoem@uib.no](mailto:frida.hoem@uib.no))

- [jm-43-497-2024-supplement-title-page.pdf](#)
- [Supplementary information Hoem et al., 2024 JoM.pdf](#)
- [Table S3 DY087-15.xlsx](#)
- [Table S4 DY087-9.xlsx](#)
- [Table S5 Site 696.xlsx](#)
- [Table S6 Site U1536.xlsx](#)

The copyright of individual parts of the supplement might differ from the article licence.
