# Supplementary material for: Stepwise Oligocene–Miocene breakdown of subpolar gyres and strengthening of the Antarctic Circumpolar Current
Source: Copernicus journal article supplement (doi:10.5194/jm-43-497-2024), 2024-12-19
Supplement: Supplementary file 2 [file jm-43-497-2024-supplement.zip]

Supplementary information to Hoem et al.,  
**Stepwise Oligocene–Miocene breakdown of sub-polar gyres and strengthening of the Antarctic Circumpolar Current**

**Age models**

**Table S1: Site 696 age model, adapted from Hoem et al., 2023.**

| Event/Characteristic                    | Kind                    | Lower level       | Upper level      | Bottom depth | Top depth | Mid-depth | Reference                                                          | Age (Ma)  | Reference biozonation scheme                                                         |
|-----------------------------------------|-------------------------|-------------------|------------------|--------------|-----------|-----------|--------------------------------------------------------------------|-----------|--------------------------------------------------------------------------------------|
| <i>FAD Denticulopsis maccollumii</i> ;  | Diatoms                 | 50R-2W, 26-29 cm  | 50R-1W, 88-92 cm | 521.91       | 521.08    | 52.49     | Gersonde and Burckle, (1990); López-Quirós et al. (2018; in prep.) | 16.5-16.7 | Harwood and Maruyama (1992); Ramsay and Baldauf (1999); Censarek and Gersonde (2002) |
| <i>FAAD Actinocyclus ingens</i>         | Diatoms                 | 50R-2W, 26-29 cm  | 50R-1W, 88-92 cm | 521.91       | 521.08    | 521.49    | López-Quirós et al. (in prep.)                                     | 16.5-16.7 | Harwood and Maruyama (1992); Ramsay and Baldauf (1999); Censarek and Gersonde (2002) |
| <i>Gelatia inflata</i>                  | Dinocyst                | 51-1W, 143-145 cm |                  |              |           | 531.23    | <i>This study</i>                                                  | 33.7-23   | <i>Bijl et al., (2018a)</i>                                                          |
| <i>FO Chiropteridium Galea</i>          | Dinocysts               | 53R-3W, 80 cm     | 53R-2W, 130 cm   | 552.70       | 551.70    | 552.20    | <i>Houben et al. 2012</i>                                          | <33.6     | <i>Pross et al. (2010)</i>                                                           |
| <i>FO Malvinia escutiana</i>            | Dinocysts               | 55R-1W, 117 cm    | 55R-1W, 62 cm    | 569.39       | 568.82    | 569.11    | <i>Houben et al. 2012; 2013</i>                                    | 33.7      | <i>Houben et al. (2011)</i>                                                          |
| <i>FO Stoveracysta kakanuiensis</i>     | Dinocysts               | 55R-3W, 75 cm     | 55R-2W, 147 cm   | 571.95       | 571.16    | 571.55    | <i>Houben et al. 2012; 2013</i>                                    | 34.1      | <i>Clowes (1985)</i>                                                                 |
| <i>FO Reticulofenestra oarnaruensis</i> | Calcareous nannofossils | 58R-1W, 122 cm    | 57R-1W, 112 cm   | 598.42       | 588.72    | 588.72    | <i>Wei and Wise, 1990</i>                                          | ~35.5     | <i>Villa et al. (2008)</i>                                                           |
| <i>FCO Istmolithus recurvus</i>         | Calcareous nannofossils | 60R-1W, 36 cm     | 59R-CC           | 616.96       | 616.6     | 616.78    | <i>Wei and Wise, 1990</i>                                          | 36.27     | <i>Villa et al. (2008)</i>                                                           |
| <i>FO Reticulofenestra bisecta</i>      | Calcareous nannofossils | 62R-6W, 132 cm    | -                | 643.62       | -         | 643.62    | <i>Wei and Wise, 1990</i>                                          | <37.61    | <i>Villa et al. (2008)</i>                                                           |

**Table S2: Biostratigraphic datums summarised for the depth of the stratigraphic discontinuities with sediment reflectors from Pérez et al., (2021)**

| Type               | Event | Taxa                                      | Published Age (Ma) | Top    | Bottom | Mid depth (mbsf) |
|--------------------|-------|-------------------------------------------|--------------------|--------|--------|------------------|
| <b>Hole U1536E</b> |       |                                           |                    |        |        |                  |
| <b>Reflector-b</b> |       |                                           |                    |        |        |                  |
| DIAT               | LO    | <i>Fragilariopsis praeinterfrigidaria</i> | 3.5                | 4R-CC  | 5R-CC  | 366.37           |
| DIAT               | FO    | <i>Rhizosolenia harwoodii</i>             | 3.6                | 4R-CC  | 5R-CC  | 366.37           |
| RAD                | LO    | <i>Lampromitra coronata</i>               | 3.72               | 4R-CC  | 5R-CC  | 366.37           |
| DIAT               | LO    | <i>Fragilariopsis aurica</i>              | 4.2                | 7R-CC  | 9R-CC  | 403.065          |
| DIAT               | LO    | <i>Fragilariopsis praecurta</i>           | 4.2                | 7R-CC  | 9R-CC  | 403.065          |
| DIAT               | FO    | <i>Fragilariopsis barronii</i>            | 4.4                | 7R-CC  | 9R-CC  | 403.065          |
| DIAT               | LO    | <i>Denticulopsis delicata</i>             | 4.45               | 7R-CC  | 9R-CC  | 403.065          |
| DIAT               | LO    | <i>Fragilariopsis arcula</i>              | 4.5                | 7R-CC  | 9R-CC  | 403.065          |
| DIAT               | LO    | <i>Fragilariopsis curta</i>               | 4.7                | 7R-CC  | 9R-CC  | 403.065          |
| RAD                | FO    | <i>Helotholus vema</i>                    | 4.59               | 7R-CC  | 9R-CC  | 403.065          |
| <b>Reflector-c</b> |       |                                           |                    |        |        |                  |
| PALY               | FO    | <i>Operculodinium? eirikianum</i>         | 8.4                | 26R-CC | 27R-CC | 574.8025         |
| DIAT               | FO    | <i>Fragilariopsis aurica</i>              | 8.4                | 30R-CC | 31R-CC | 613.245          |
| DIAT               | FO    | <i>Denticulopsis simonsenii</i>           | 14.2               | 31R-CC | 32R-CC | 622.58           |
| DIAT               | LO    | <i>Denticulopsis maccollumii</i>          | 14.3               | 31R-CC | 32R-CC | 622.58           |
| PALY               | FO    | <i>Impagidinium patulum</i>               | 15.97              | 31R-CC | 32R-CC | 622.58           |

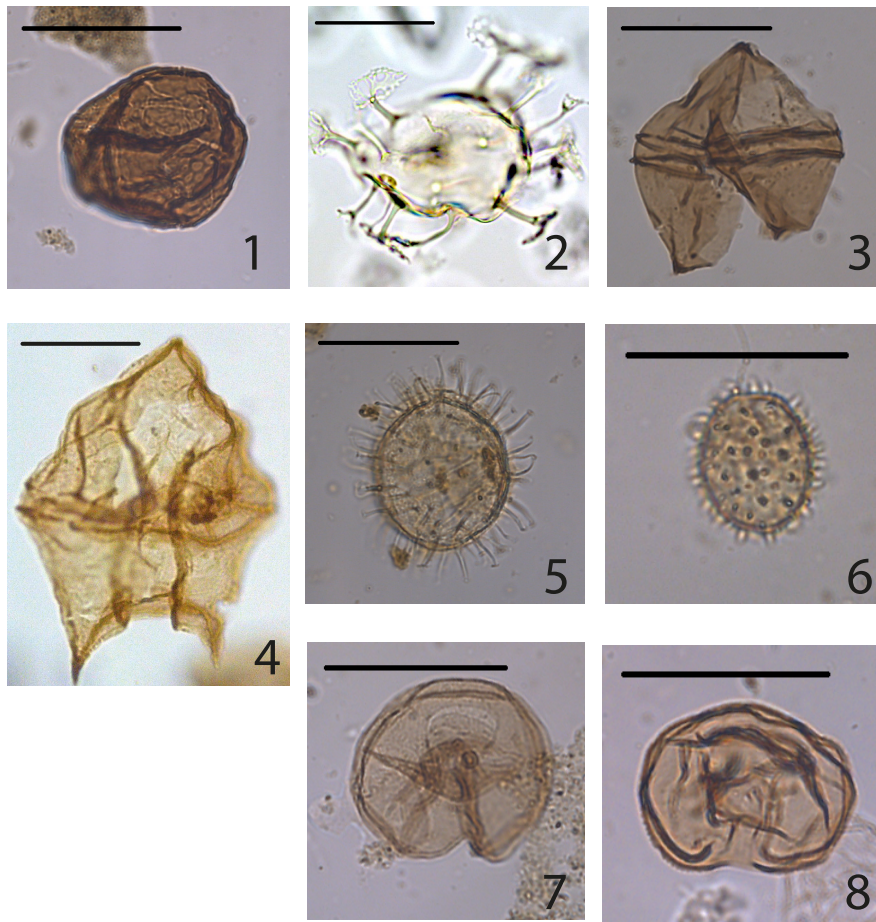

**Plate S1. Light Microscopy photos of common dinocysts at ODP Site 696, Core 50R–52R, 55R. The black scale bars represent 20  $\mu$ m.**

1. *Brigantedinium pynei* 696-50R-1W, 86-88 cm
2. *Enneadocysta dictyostila* 696-52R-1W, 10-12 cm
3. *Lejeunecysta adeliensis* 696-52R-1W, 86-88 cm
4. *Lejeunecysta adeliensis* 696-55R-1W, 69-71 cm
5. *Operculodinium centrocarpum* 696-50R-1W, 86-88 cm
6. *Operculodinium janduchenei* 696-50R-1W, 86-88 cm
7. *Selenopemphix nephroides* 696-50R-1W, 86-88 cm
8. *Selenopemphix undulata* 696-50R-1W, 86-88 cm

Bijl, P. K., Houben, A. J., Bruls, A., Pross, J., and Sangiorgi, F.: Stratigraphic calibration of Oligocene-Miocene organic-walled dinoflagellate cysts from offshore Wilkes Land, East Antarctica, and a zonation proposal, *Journal of Micropalaeontology*, 37, 105-138, 2018a

Censarek, B., Gersonde, R., 2002. Miocene diatom biostratigraphy at ODP Sites 689, 690, 1088, 1092 (Atlantic sector of the Southern Ocean). *Marine Micropaleontology* 45, 309–356.

Clowes, C. D.: Stoveracysta, a new gonyaulacacean dinoflagellate genus from the upper Eocene and lower Oligocene of New Zealand, *Palynology*, 9, 27-35, 1985.

Gersonde, R. and Burckle, L.H.: Neogene diatom biostratigraphy of OPD Leg 113, Weddell Sea (Antarctic Ocean). In: Barker, P.F., Kennett, J.P. et al. (Eds.). *Proceedings of the Ocean Drilling Program Scientific Results 113*, 761-789, 1990.

- Harwood, D.M., Maruyama, T., 1992. Middle Eocene to Pleistocene diatom biostratigraphy of Southern Ocean sediments from the Kerguelen Plateau, Leg 120. In: Wise Jr. S.W., Schlich, R. et al. (Eds.), *Proceedings of the Ocean Drilling Program, Scientific Results*, vol. 120(2). Ocean Drilling Program, College Station, TX, pp. 683–733.
- Houben, A. J., Bijl, P. K., Pross, J., Bohaty, S. M., Passchier, S., Stickley, C. E., Röhl, U., Sugisaki, S., Tauxe, L., and van de Flierdt, T.: Reorganization of Southern Ocean plankton ecosystem at the onset of Antarctic glaciation, *Science*, 340, 341-344, 2013.
- Houben, A. J., van Mourik, C. A., Montanari, A., Coccioni, R., and Brinkhuis, H.: The Eocene–Oligocene transition: Changes in sea level, temperature or both?, *Palaeogeogr Palaeoclimatol*, 335, 75-83, 2012.
- López-Quirós, A., Escutia, C., Etourneau, J., Rodríguez-Tovar, F.J., Bijl, P.K., Lobo, F.J., Bohoyo, F., Evangelinos, D., Salabarnada, A.: Eocene-Miocene paleoceanographic changes in Drake Passage (Antarctica). *POLAR 2018: Where the Poles come together. Abstract Proceedings*, 487. Publisher: WSL Institute for Snow and Avalanche Research SLF. ISBN 978-0- 948277-54-2, 2018.
- Pérez, L. F., Martos, Y. M., García, M., Weber, M. E., Raymo, M. E., Williams, T., Bohoyo, F., Armbricht, L., Bailey, I., and Brachfeld, S.: Miocene to present oceanographic variability in the Scotia Sea and Antarctic ice sheets dynamics: Insight from revised seismic-stratigraphy following IODP Expedition 382, *Earth and Planetary Science Letters*, 553, 116657, 2021.
- Pross, J., Houben, A. J., van Simaey, S., Williams, G. L., Kotthoff, U., Coccioni, R., Wilpshaar, M., and Brinkhuis, H.: Umbria–Marche revisited: a refined magnetostratigraphic calibration of dinoflagellate cyst events for the Oligocene of the Western Tethys, *Review of Palaeobotany and Palynology*, 158, 213-235, 2010.
- Ramsay, A.T.S., Baldauf, J.G., A reassessment of the Southern Ocean biochronology, *Geological Society Memoir*, vol. 18. The Geological Society, London, 1999.
- Villa, G., Fioroni, C., Pea, L., Bohaty, S., and Persico, D.: Middle Eocene–late Oligocene climate variability: calcareous nannofossil response at Kerguelen Plateau, Site 748, *Marine Micropaleontology*, 69, 173-192, 2008.
- Wei, W. and Wise Jr, S. W.: Biogeographic gradients of middle Eocene-Oligocene calcareous nannoplankton in the South Atlantic Ocean, *Palaeogeography, Palaeoclimatology, Palaeoecology*, 79, 29-61, 1990.
