# Supplementary material for: Stepwise Oligocene–Miocene breakdown of subpolar gyres and strengthening of the Antarctic Circumpolar Current
Source: Copernicus journal article supplement (doi:10.5194/jm-43-497-2024), 2024-12-19
Supplement: Supplementary file 2 [file Table S3 DY087-15.xlsx]

## Sheet: DY087-15
	Depth	age	unit	Sieve	Lycopodium tablet size	Dry weight g	Lycopodium per g	Lycopodium	Impagidinium pallidum	Impagidinium aculeatum	Impagidinium velorum	Impagidinium patulum	Other Impagidinium	Nematosphaeropsis labyrinthus	Pyxidinopsis spp. (pars)	Operculodinium centrocarpum	Operculodinium janduchenei	Spiniferites spp.	Batiacasphaera	Gelatia inflata	Invertocysta tabulata	Achomosphaera alcicornu	Other Gonyaulax	indet	Reworked Eocene Dinocysts	Acritarchs	Pollen	minerals	wood	diatoms	Total palynomorphs	Total Dinocysts detected	Selenopemphix, Lejeunecysta	Brigantedinium	Selenopemphix antarctica	Spinidinium, Vozzhennikovia	Other P-cysts	Spiniferites	Impagidinium	Operculodinium	Nemaosphaeropsis labyrinthus	Cerebrocysta, Corrudinium, Pyxidinopsis, Batiacasphaera	Other G-cysts	Enneadocysta	sum%	dinocysts %	terrestrial palynomorphs %	acritarchs %
15PC 100-105 cm	103	Early Miocene	EM	10 µm	9666	15.0656	641.594	338	37	4	39	2	5	58	4	28	20	5	1		5			10		33	15	yes+	yes+		256	208						2.40385	41.8269	23.0769	27.8846	2.40385	2.40385	0	100	81.25	5.85938	12.8906
15PC 160-165 cm	163	Late Oligocene	LO	10 µm	9666	15.1358	638.618	87	1	9			4	1		178		1		16				2		8	1		yes++		219	210						0.47619	6.66667	84.7619	0.47619	0	7.61905	0	100	95.8904	0.456621	3.65297
15PC 180-185 cm	183		LO	10 µm	9666	15.2882	632.252	44	5			1			2	198			1	8				3		3	3		yes++	yes+++	221	215						0	2.7907	92.093	0	1.39535	3.72093	0	100	97.2851	1.35747	1.35747
15PC 200-205 cm	203		LO	10 µm	9666	15.1301	638.859	188	13				2	11		155		1	1	29				4		6	19	yes+++			237	212						0.471698	7.07547	73.1132	5.18868	0.471698	13.6792	0	100	89.4515	8.01688	2.53165
15PC 218-223 cm	221		LO	10 µm	9666	15.9939	604.355	74	3			1		2		185				10				5		9	19	yes++++		yes++	229	201						0	1.99005	92.0398	0.995025	0	4.97512	0	100	87.7729	8.29694	3.93013
15PC 231-236 cm	234	Late Oligocene	LO	10 µm	9666	15.0399	642.69	148	27					1		176			11	14				7		27	25	yes++			281	229						0	11.7904	76.8559	0.436681	4.80349	6.11354	0	100	81.4947	8.8968	9.60854
