# Supplementary material for: Stepwise Oligocene–Miocene breakdown of subpolar gyres and strengthening of the Antarctic Circumpolar Current
Source: Copernicus journal article supplement (doi:10.5194/jm-43-497-2024), 2024-12-19
Supplement: Supplementary file 3 [file Table S4 DY087-9.xlsx]

## Sheet: DY087-09
	Sample	Depth (cm)	age	unit	Sieve	Lycopodium tablet size	Dry weight g	Lycopodium per g	Lycopodium	Impagidinium pallidum	Impagidinium aculeatum	Impagidinium velorum	Impagidinium patulum	Other Impagidinium	Nematosphaeropsis labyrinthus	Pyxidinopsis spp. (pars)	Operculodinium centrocarpum	Operculodinium janduchenei	Spiniferites spp.	Batiacasphaera spp.	Gelatia inflata	Invertocysta tabulata	Achomosphaera alcicornu	Other Gonyaulax		indet	Reworked Eocene Dinocysts	Acritarchs	Pollen	minerals	wood	Total palynomorphs	Total Dinocysts detected	Selenopemphix, Lejeunecysta	Brigantedinium	Selenopemphix antarctica	Spinidinium, Vozzhennikovia	Other P-cysts	Spiniferites	Impagidinium	Operculodinium	Nemaosphaeropsis labyrinthus	Cerebrocysta, Corrudinium, Pyxidinopsis, Batiacasphaera	Other G-cysts	Enneadocysta	sum%	dinocysts %	terrestrial palynomorphs %	acritarchs %
	09PC 60-65 cm	63	Early Miocene	EM	10 µm	9666	14.9064	648.446	485	26	3	11	2	7	99	10		49	2	4		2				1		277	7	yes		499	215						0.930233	22.7907	22.7907	46.0465	6.51163	0.930233	0	100	43.0862	1.40281	55.511
	09PC 80-85 cm	83	Early Miocene	EM	10 µm	9666	17.8175	542.5	124	42	2	14	2	9	93	10	2	26	6	2		3	2			4		161	26	yes+		400	213						2.8169	32.3944	13.1455	43.662	5.6338	2.34742	0	100	53.25	6.5	40.25
	09PC 120-125 cm	123	Early Miocene	EM	10 µm	9666	15.2109	635.465	286	53		4	3	2	68	27	11	30	11	2		8				4		383	9	yes+++		611	219						5.02283	28.3105	18.7215	31.0502	13.242	3.65297	0	100	35.8429	1.473	62.6841
	09PC 140-145 cm	143	Early Miocene	EM	10 µm	9666	15.113	639.582	327	31	1	13	3	5	70	17	27	28	8	1		14		1		7		318	37	yes+++		573	219						3.65297	24.2009	25.1142	31.9635	8.21918	6.84932	0	100	38.2199	6.45724	55.4974
	09PC 160-165 cm	163	Early Miocene	EM	10 µm	9666	15.1176	639.387	354	54	1	16	16	10	66	10	7	4	4	4		14				4		435	64			705	206						1.94175	47.0874	5.33981	32.0388	6.79612	6.79612	0	100	29.2199	9.07801	61.7021
	09PC 186-191 cm	189	Early Miocene	EM	10 µm	9666	16.3613	590.784	382	31	1	14	16	18	71	1	48	11	2	2		8				5		624	7			854	223						0.896861	35.8744	26.4574	31.8386	1.34529	3.58744	0	100	26.1124	0.819672	73.0679
	09PC 200-205 cm	203	Early Miocene	EM	10 µm	9666	15.0933	640.417	340	20	1	39	2	11	69	13	5	7	6	3		26				9		702	19	yes++		923	202						2.9703	36.1386	5.94059	34.1584	7.92079	12.8713	0	100	21.8852	2.0585	76.0563
	09PC 220-225 cm	223	Early Miocene	EM	10 µm	9666	15.1911	636.294	326	23	1	44	7	11	62	8	16	10	10			14				2		639	29	yes+++		874	206						4.85437	41.7476	12.6214	30.0971	3.8835	6.79612	0	100	23.5698	3.31808	73.1121
	09PC 240-245 cm	243	Early Miocene	EM	10 µm	9666	15.2214	635.027	210	33		3		1	83	15	9	23	7	2		22	1			8		155	66	yes++	yes++	420	199						3.51759	18.593	16.0804	41.7085	8.54271	11.5578	0	100	47.381	15.7143	36.9048
	09PC 260-265 cm	263	Early Miocene	EM	10 µm	9666	15.021	643.499	178	20		23		7	50	2	23	8	40	2		37	1			3		256	125			594	213						18.7793	23.4742	14.554	23.4742	1.87793	17.8404	0	100	35.8586	21.0438	43.0976
	09PC 280-285 cm	283	Early Miocene	EM	10 µm	9666	15.0953	640.332	133	17		2	2	3	157	10	6	14	2	4		6	1			4		65	21	yes+		310	224						0.892857	10.7143	8.92857	70.0893	6.25	3.125	0	100	72.2581	6.77419	20.9677
	09PC 307-312 cm	310	Early Miocene	EM	10 µm	9666	15.1768	636.893	193	40	1		1	2	146	7	4	18		5		6				4		71	20			321	230						0	19.1304	9.56522	63.4783	5.21739	2.6087	0	100	71.6511	6.23053	22.1184
