# Supplementary material for: Stepwise Oligocene–Miocene breakdown of subpolar gyres and strengthening of the Antarctic Circumpolar Current
Source: Copernicus journal article supplement (doi:10.5194/jm-43-497-2024), 2024-12-19
Supplement: Supplementary file 5 [file Table S6 Site U1536.xlsx]

## Sheet: U1536 slide overview
EXPEDITION	SITE	HOLE	CORE	CORE_TYPE	SECTION	TOP_DEPTH	BOTTOM_DEPTH	MBSF_TOP	SAMPLE	slide	Comment	Brigantedinium simplex	Cerebrocysta spp.	Impagidinium sp.	Impagidinium victorianum?	Lejeunecysta sp.	Lejeunecysta acuminata	Operculodinium sp.	Operculodinium? eirikianum	Pyxidinopsis sp.	Selenopemphix spp	Selenopemphix antarctica		Leiosphaeridia sp.	pyritized siliceous microfossil remains	trilete spores	bisaccate	acritarch	nothofagus
382	1536	E	15	R	1	51	55	463.51	5186356	1	Almost arren of dinocysts. Some pyritization	x						x							xx	xx	x	x
382	1536	E	15	R	4	10	15	466.34	5186361	1	Barren of dinocysts. lots of leftover minerals
382	1536	E	16	R	1	71	76	473.31	5186365	1	Abundant pyritized siliceous microfossil remains														xx
382	1536	E	17	R	2	13	18	483.83	5186373	1	Barren of dinocysts. Some pollen and pyritized siliceous microfossil remains														xx	x			x
382	1536	E	19	R	1	25	30	501.65	5186382	1	Barren of dinocysts. Some pollen and pyritized siliceous microfossil remains														x	x
382	1536	E	19	R	4	50	55	506.4	5186387	1	Almost barren. A few Lejeuenacysta and Brigantedinium	x	x											x	x	x	x
382	1536	E	20	R	2	3	8	512.53	5186392	2	Barren of dinocysts. Some pollen and pyritized siliceous microfossil remains	x	x												xx	x	x	x	x
382	1536	E	21	R	1	66	71	521.26	5186397	1	Almost barren of dinocysts	x								x						x		x
382	1536	E	22	R	1	136	141	531.56	5186406	2	Almost barren of dinocysts. Some pollen and pyritized siliceous microfossil remains	x													x	x
382	1536	E	23	R	1	40	45	540.2	5186415	2	A couple of dinocysts, but reduced preservation. Abundant phytoclast	x	x			x										x
382	1536	E	24	R	1	116	121	550.56	5186423	1	Barren of dinocysts. lots of leftover minerals. Some pollen and pyritized siliceous microfossil remains														x
382	1536	E	25	R	1	100	105	560	5186428	1	Almost barren of dinocysts	x													xx	x
382	1536	E	26	R	1	123	125	569.83	5186436	1	almost barren of dinocysts. More pollen					x										xx	x		x
382	1536	E	28	R	1	56	59	588.36	5186444	1	Barren of dinocysts. lots of leftover minerals	x													xx
382	1536	E	29	R	1	70	75	598.1	5186450	1	almost barren of dinocysts. More pollen	x													x	x	x
382	1536	E	30	R	1	46	51	607.46	5186458	1	Barren of dinocysts. lots of leftover minerals
382	1536	E	31	R	1	43	46	617.03	5186466	1	almost barren. lots of leftover minerals	x									x				x
382	1536	E	32	R	1	20	22	626.4	5186471	1	More common dinocysts. Relatively diverse, abundant Brigantadinium, a couple of Impagidinium	xx		x	x	x	x	x	x			x			xx	x	x	x	x
382	1536	E	33	R	1	35	40	636.15	5186477	1	More diluted slide than above. Few dinocysts . lots of leftover minerals	x			x	x									x	x
382	1536	E	33	R	2	10	15	637.22	5186481	1	A couple of dinocysts. Diluted and high reworking	x		x							x				x	x	x
											*in general, slides are diluted with some fragments of organic material and abundant phytoclast.
											A small increasing amount of dinocysts with depth
											A few pieces of dinos, but mainly broken pollen and spores. Medium to low preservation.
											x= present, xx= abundant

## Sheet: Site U1536 shipboard counts
Sample	Top Depth [m]	Bottom Depth [m]	Processing technique	Preservation palynofacies	Dinocysts	Sporomorphs	Prasinophytes	Acritarchs	Foraminiferal linings	Black phytoclasts	Brown phytoclasts	Amorphous organic matter	Pyritized microfossils	Copepod remains	Saccate pollen	Nothofagus pollen	Other pollen	Fungal Spores	trilete spores	Dinocysts reworked	Pollen/spores reworked	Achomosphaera spp.	Batiacasphaera sp.	Brigantedinium simplex	Brigantedinium spp.	Brigantedinium sp.1	Brigantedinium pyinei	Cerebrocysta spp.	Cryodinium meridianum	Cymatiosphaera transparent sp. 1	Cymatiosphaera brown sp. 3	Cymatiosphaera brown sp. 4	Cymatiosphaera sp.	Deflandrea antarctica	Deflandrea phosphoritica	Deflandrea sp. A	Echinidinium sleipnerensis	Enneadocysta	Impagidinium sp.	Impagidinium patulum	Islandinium round brown/spiny	Leiosphaeridia sp.	Lejeunecysta sp.	Lejeunecysta acuminata	Lejeunecysta fallax	Lejeunecysta rotunda	Nucicla umbiliphora	Operculodinium centrocarpum	Operculodinium? eirikianum
15R-CC	468.65	468.7	HF	M	R	C	R	R	R	F	C	F	D	R	C	B	R	R	F	R	C			X	X						X											X
16R-CC	476.64	476.69	HF	P	C		B								F	R	R	BR	C	F	F				X						X													X					X
17R-CC	485.54	485.59	both	P	R	C	R	R	BR	C	A	B	BR	F	F	F	F	R	F	R	R				X
19R-CC	506.95	507	HF	M	BR	F	F	R	BR	R	C	B	C	B	B	BR	BR	B	R	B	F
21R-CC	524.66	524.71	HF	M	B	R			B	R	C	R	A	B	F				F		R
23R-CC	541.53	541.58	HF	P	BR				B	R	F	R	C						F					X
24R-CC	551.6	551.65	HF	P	R	BR	B	B	B	F	C	F	C	F	B	B	B	F	BR	BR	BR			X	X
25R-1-W 131/134	560.31	560.34	HF	M	F	C	F	F	BR	F	C	R	R	F	F	BR	R	B	C	C	F							X															X
26R-CC	571.16	571.19	HF	M	BR	C	F	F	BR	BR	C	R	C	BR	F	BR	R	BR	C	BR	R			X																		X	X					X
28R-CC	588.68	588.73	HF	M	F	C	BR	BR	R	BR	C	R	BR	B	F	B	R	BR	C	R	F			X
30R-CC	609	609.05	HF	M	F	F	R	F	BR	F	C	A	R	F	F	F	R	R	F	F	F			X	XX															X			X
31R-CC	617.45	617.48	HF	G	A	F	R	R	F	R	C	C	F	R	B	F	F	F	F	R	F		X	X	X						X		X						XX	XX			XX	X					X
32R-CC	627.68	627.71	HF	M	C	C	C	F	R	R	A	F	F	R	BR	C	R	F	F	F	F			XX	X	X							X									X	X						X
33R-2-W 98/100	638.1	638.12	HF	M	C	F	C	F	F	F	C	R	R	R	BR	F	R	R	F	C	F			XX	XX	X	X					X										X	X	X	X
[truncated: 13 more columns]
